# Supplementary material
Source: PubMed Central journal article supplement (PMC4273242)
Supplement: NIHMS641911-supplement-Title_Page.pdf [file NIHMS641911-supplement-Title_Page.pdf]

## Measuring trainer fidelity in the transfer of suicide prevention training

Wendi F. Cross,<sup>1,2</sup> Anthony R. Pisani,<sup>1,2</sup> Karen Schmeelk-Cone,<sup>1</sup> Yinglin Xia,<sup>3</sup> Xin Tu,<sup>3</sup>

Marcie McMahon,<sup>4</sup> Jimmie Lou Munfakh,<sup>5</sup> and Madelyn S. Gould<sup>5,6</sup>

<sup>1</sup> Department of Psychiatry, University of Rochester Medical Center (URMC), Rochester, NY, USA

<sup>2</sup> Department of Pediatrics, University of Rochester Medical Center (URMC), Rochester, NY, USA

<sup>3</sup> Department of Biostatistics and Computation Biology, University of Rochester Medical Center (URMC), Rochester, NY, USA

<sup>4</sup> Center for Employee Wellness at the School of Nursing at the University of Rochester Medical Center (URMC), Rochester, NY, USA

<sup>5</sup> Division of Child and Adolescent Psychiatry at the New York State Psychiatric Institute, New York, NY, USA

<sup>6</sup> Departments of Psychiatry and Epidemiology (School of Public Health), Columbia University Medical Center, New York, NY, USA
